# Supplementary material for: The effect of aliphatic chain length on the self-assembly of wedge-shaped cesium 3,4,5-tris(alkyloxy)benzenesulfonates
Source: Royal Society of Chemistry journal article supplement (doi:10.1039/d2me00218c), 2022-12-19
Supplement: d2me00218c1.pdf [file d2me00218c1.pdf]

ARTICLE

## The effect of aliphatic chain length on the structure of supramolecular aggregates formed by cesium 3,4,5-*tris*(alkyloxy)benzenesulfonates and on their phase behavior

Received 00th 2020,  
Accepted 00th 2020

DOI:

Stupnikov A.A.<sup>a,b</sup>, Bakirov A.V.<sup>a,c</sup>, Shcherbina M.A.<sup>c,d</sup>, Beginn U.<sup>e</sup>, Möller M.<sup>f</sup>, Chvalun S.N.<sup>a,c</sup>

### Supplementary

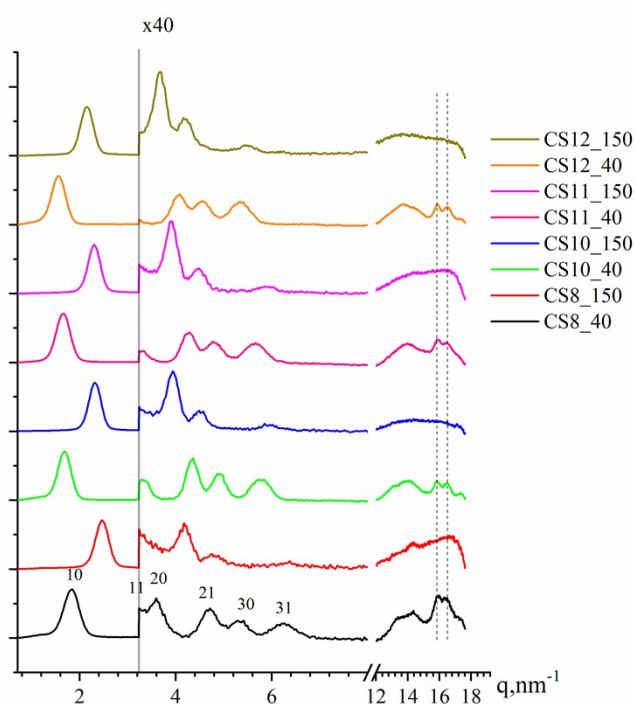

Figure 1S. Wide-angle XRD patterns comparison of columnar hexagonal ordered at 40°C and columnar hexagonal disordered at 150°C phases, for convenience the scale was multiplied by 40.

<sup>a</sup> National Research Center Kurchatov Institute, 1 pl. Akad. Kurchatova, 123182 Moscow, Russian Federation.

<sup>b</sup> Moscow Technological University, Institute of Fine Chemical Technologies, 86 prosp. Vernadskogo, 119571 Moscow, Russian Federation

<sup>c</sup> Enikolopov Institute of Synthetic Polymeric Materials, Russian Academy of Science, 70 ul. Profsoyuznaya, 117393 Moscow, Russian Federation

<sup>d</sup> Moscow Institute of Physics and Technology, 4 Institutsky line, 141700 Dolgoprudny, Moscow region, Russian Federation

<sup>e</sup> Organic Materials Chemistry, Institute for Chemistry, University Osnabrück, D-49069 Osnabrück, Germany

<sup>f</sup> Institute of Technical and Macromolecular Chemistry, RWTH Aachen and DWI e.V., D 52056 Aachen, Germany

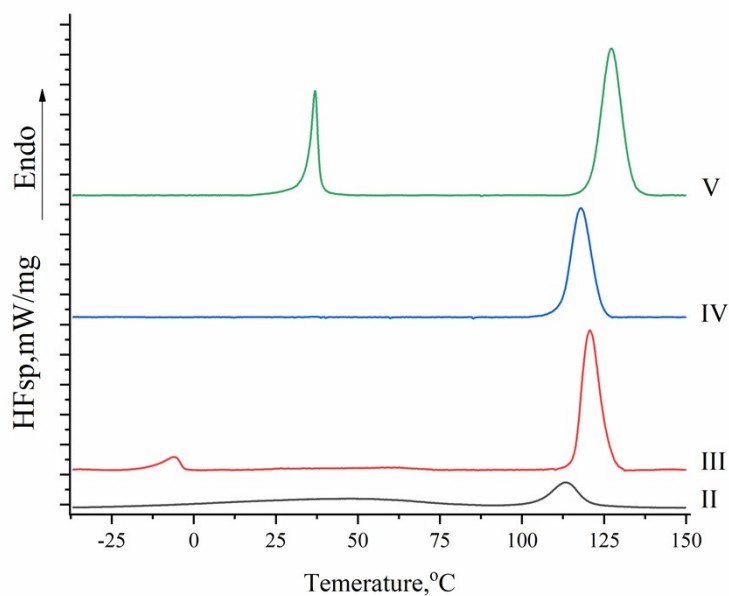

Figure 2S. DSC curves for caesium 3,4,5-tris(alkyloxy)benzenesulphonates

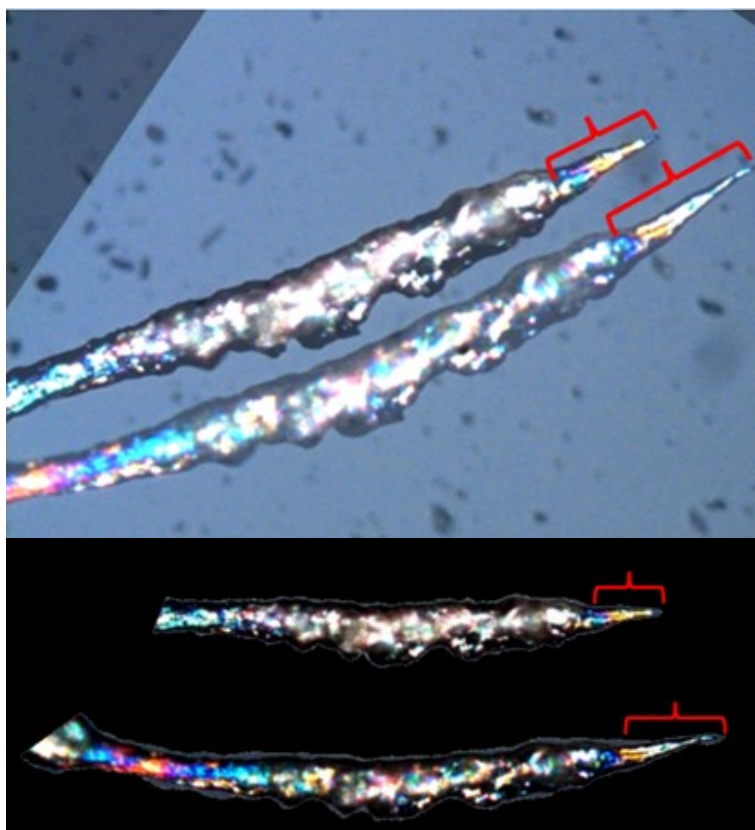

Figure 3S. 23% length elongation of annealed fiber of compound V from 90°C upper to 120°C

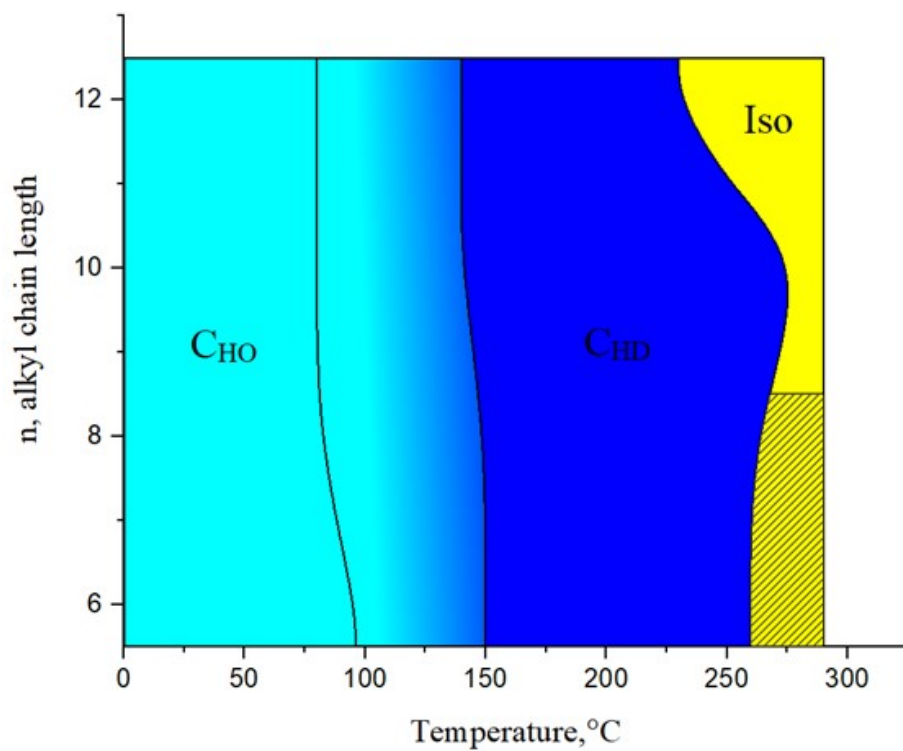

Figure 4S. Phase diagram for cesium 3,4,5-tris(alkyloxy)benzenesulfonates with alkyl chain length from 6-12 methylene units
